# Supplementary material for: Synthesis and characterisation of the first carbene and diazabutadiene–indium(ii) complexesElectronic supplementary information (ESI) available: synthetic details. See http://www.rsc.org/suppdata/cc/b2/b202532a/
Source: Royal Society of Chemistry journal article supplement (doi:10.1039/b202532a), 2002-05-01
Supplement: b202532a.doc [file b202532a.doc]

**Supplementary Material (ESI) for Chemical Communications**

**This journal is © The Royal Society of Chemistry 2002**

**Synthesis and Characterisation of the First Carbene and**

**Diazabutadiene-Indium(II) Complexes**

**Robert J. Baker, Robert D. Farley, Cameron Jones*, Marc Kloth and Damien M. Murphy.**

**SUPPLEMENTARY SYNTHETIC DETAILS**

[In2Br4(IMes)2].(C7H8)2.5 **5**: A solution of IMes (0.31g, 1.0 mmol) in toluene (20 cm3) was added to a suspension of InBr (0.20g, 1.0 mmol) in toluene (10 cm3 ) at room temperature. The resulting brown suspension was stirred for 18 hours, filtered and the filtrate placed at -30o C to yield a small amount of colourless blocks of **5**. The residue was extracted into CH2Cl2/toluene (50:50, 30 cm3) and placed at -30oC overnight to yield a second crop of **5**. total yield 0.188g, 54% (based on only 50% of indium theoretically being incorporated in the product). m.p. 185-187oC dec.; 1H NMR (400 MHz, C6D6)  2.14 (br. s, 36H, Me), 5.74 (s, 4H, NCH), 6.78 (s, 8H, ArH); IR /cm-1 1608 m, 1536 w, 1485 m, 1465 s, 1378 s, 1260 s; MS APCI m/z (%): 579 [InBr2(IMes)+, 5], 305 [IMes+, 100]. The low solubility of the product prevented meaningful 13C NMR data from being obtained. A reproducible microanalysis could not be obtained due to partial loss of toluene of solvation.

[In2Cl2(DAB**.**)2].DAB **6**: To a suspension of InCl (0.50g, 3.3 mmol) in DME (15 cm3) was added a solution of DAB (1.86g, 5 mmol) in DME (15 cm3) at -50oC. The suspension was warmed to room temperature and stirred for 4 hours to yield a deep red solution and precipitation of indium metal. This suspension was filtered and the filtrate cooled to -30oC to yield red crystals of **6** (0.274g, 12%) m.p. 84 87oC (dec.); IR /cm-1 1618 m, 1449 m, 1372 m, 1326 m, 1250 s, 1101 m, 819 m; APCI m/z (%): 377 [DABH+, 100]. The paramagnetic nature of the compound meant that no meaningful NMR data could be obtained on the compound. Reproducible microanalyses on the compound could not be obtained due to its extreme air sensitivity.
